## MELVILLE MEDAL

The Melville Medal was established in 1914 in honor of Admiral George Wallace Melville, Honorary Member and eighteenth President of the Society. It is awarded annually for the best original paper or thesis on a mechanical engineering subject presented for discussion and publication during the preceding calendar year.

The award for 1976 was presented to Bernard J. Hamrock, Senior Analyst, NASA-Lewis Research Center, Cleveland, Ohio, and Duncan Dowson, Fellow ASME, Professor, Mechanical Engineering Department, Leeds University, Institute of Tribology, Leeds, England, for their two-part paper "Isothermal Elastohydrodynamic Lubrication of Point Contacts." Part I: "Theoretical Formulation." Part II: "Ellipticity Parameter Results."

Their paper also received the ASME Lubrication Division "Best Paper Award" for 1975 which was presented at the 1976 ASME/ASLE Lubrication Conference.

Bernard Hamrock was educated at Youngstown University and Toledo University, Ohio, where he received his B.S. and M.S., respectively. He earned his Ph.D degree at Leeds University, Leeds, England. Mr. Hamrock has done research entirely in the lubrication field throughout his 15 year career.

He is presently a bearing analyst at the NASA-Lewis Research Center in Cleveland. His most recent responsibilities include planning, defining, and coordinating analytical research of the Mechanical Components Branch of the Fluid System Component Division. His research work has resulted in over 20 technical society journal articles which have been presented in Japan, Europe, and Canada, as well as the U.S.

Duncan Dowson is a professor of engineering fluid mechanics and tribology, and director of the Institute of Tribology at the University of Leeds, England. From 1952 to 1954, he was with Whitworth Aircraft Ltd. as a research and development engineer. He joined the faculty of Leeds in 1954, becoming a professor in 1966, and director of the Institute of Tribology in 1967.

Dr. Dowson has published over 150 papers in his field, has acted as a consultant to industry on tribological and fluid-flow problems, and has supervised over 50 research students. He is Fellow of England's Institution of Mechanical Engineers and a member of ASLE, the British Society of Rheology, the British Orthopaedic Research Society, and the Newcomen Society. Dowson has been honored by all of these organizations.

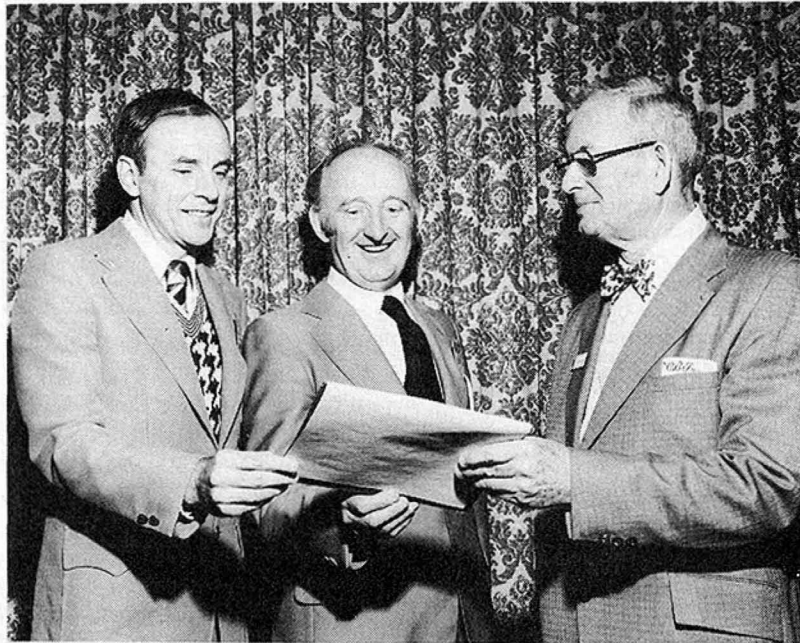

ASME Past-President Charles A. Tutt, Jr., presenting the Melville Medal to Bernard J. Hamrock, left, and Duncan Dowson
